# Supplementary material
Source: publisher figshare collection journal article supplement (https://frontiersin.figshare.com/ndownloader/files/22303899)
Supplement: Supplementary file [file 22303899]

**Table E3: Comparison of causal genetic variant detection between conventional methods and the customized GSA**

| Item   | Conventional Methods(Numbers)                        |                                                                      | GSA technology<br>(Numbers) |
|--------|------------------------------------------------------|----------------------------------------------------------------------|-----------------------------|
| Method | Previously detected variants                         | Known variants that could be investigated by GSA                     | Replicated variants by GSA  |
| SNV    | 71 *                                                 | 37                                                                   | 30                          |
| CNV    | 4                                                    | 4                                                                    | 3                           |
| Method | Newly found variants replicated by Sanger sequencing | Newly found variants that could be investigated by Sanger sequencing | Newly found variants by GSA |
| SNV    | 38                                                   | 41                                                                   | 46**                        |
| CNV    | none                                                 | none                                                                 | 2                           |

\* 34 out of 71 variants did not include when the GSA was designed.

\*\* 5 out of 46 variants could not be investigated (lack of DNA).

*GSA: Global Screening Array, CNV: copy number variants, SNV: single nucleotide variants*
